# Supplementary material for: Synthesis of Polyfluorinated Thia- and Oxathiacalixarenes Based on Perfluoro-m-xylene
Source: MDPI journal article supplement (doi:10.3390/molecules26030526), 2021-01-20
Supplement: s1 [file s1]

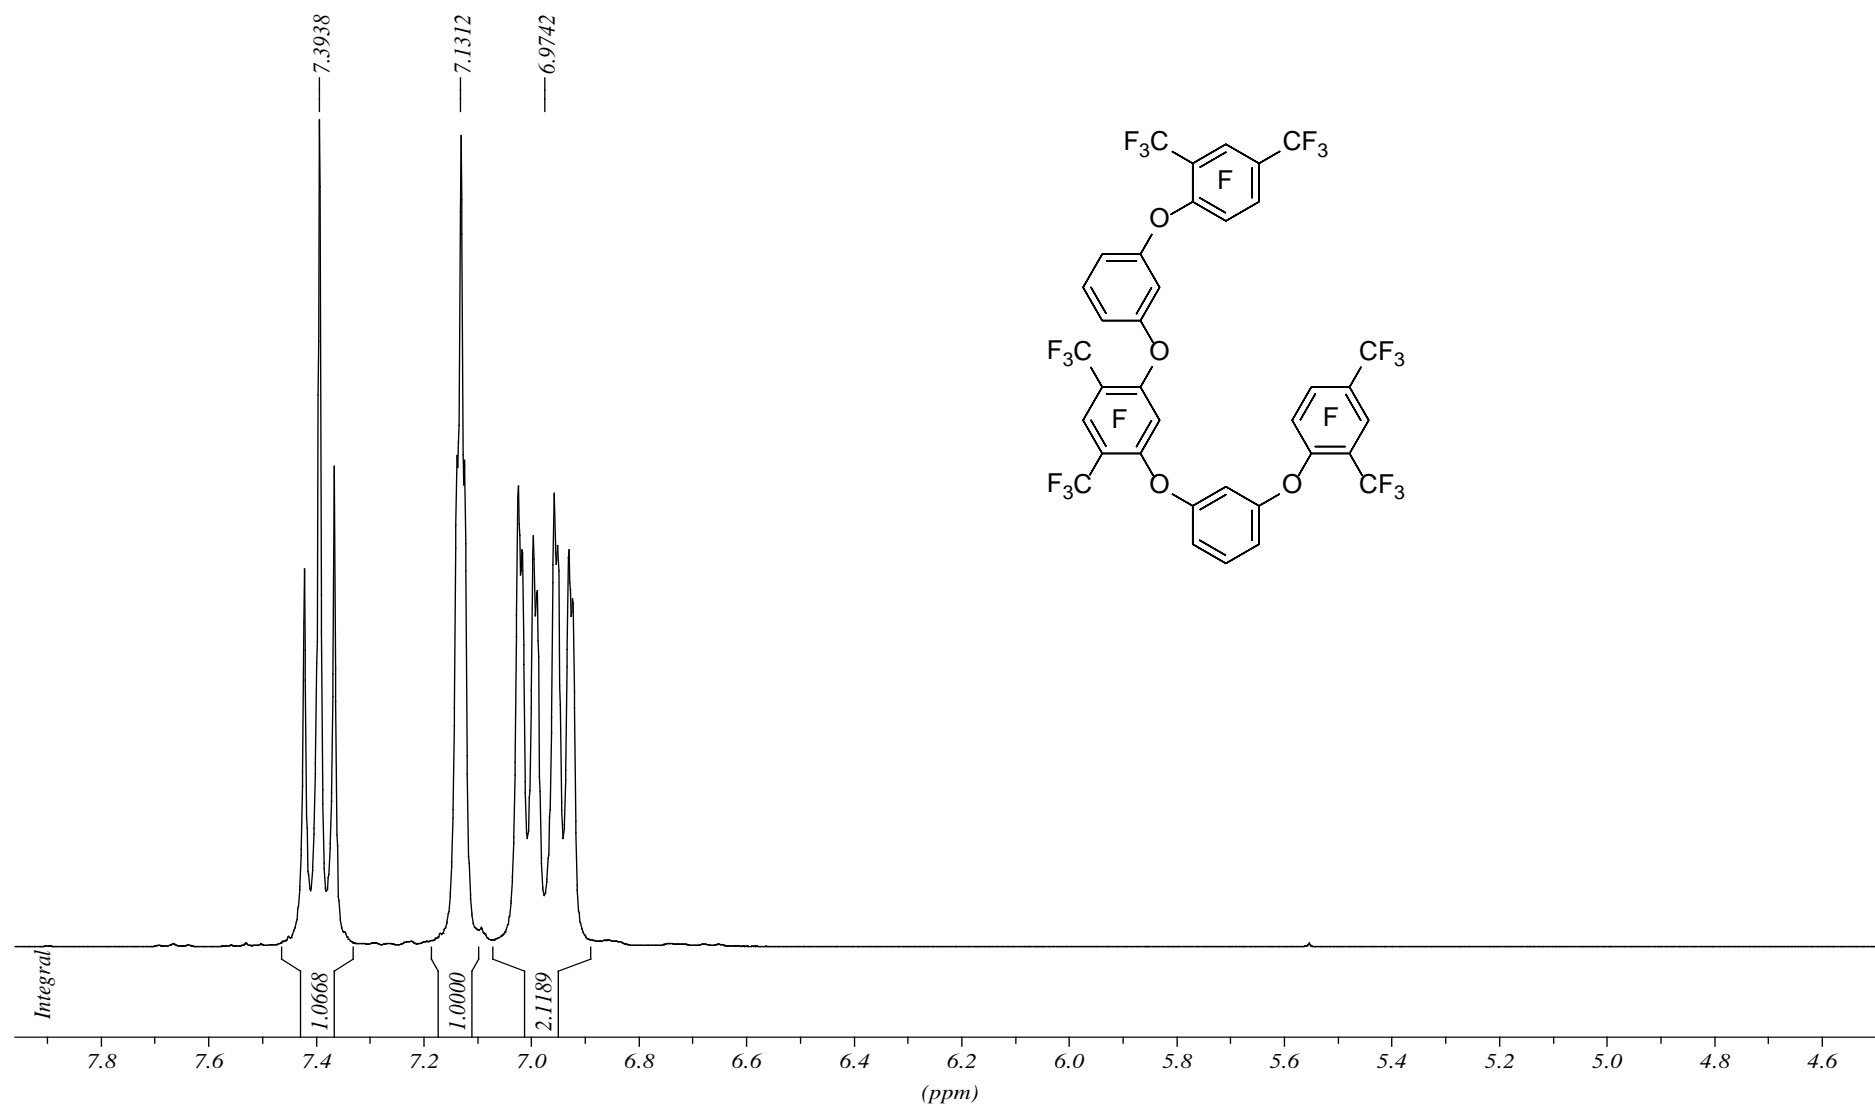

Figure S2.  $^1\text{H}$  NMR spectra (acetone- $\text{d}_6$ ) of 1,3-bis{3-[3,5,6-trifluoro-2,4-bis(trifluoromethyl)phenoxy]phenoxy}-2,5-difluoro-4,6-bis(trifluoromethyl)benzene **13**.
