# Supplementary material for: Synthesis of Polyfluorinated Thia- and Oxathiacalixarenes Based on Perfluoro-m-xylene
Source: MDPI journal article supplement (doi:10.3390/molecules26030526), 2021-01-20
Supplement: s1 [file s1]

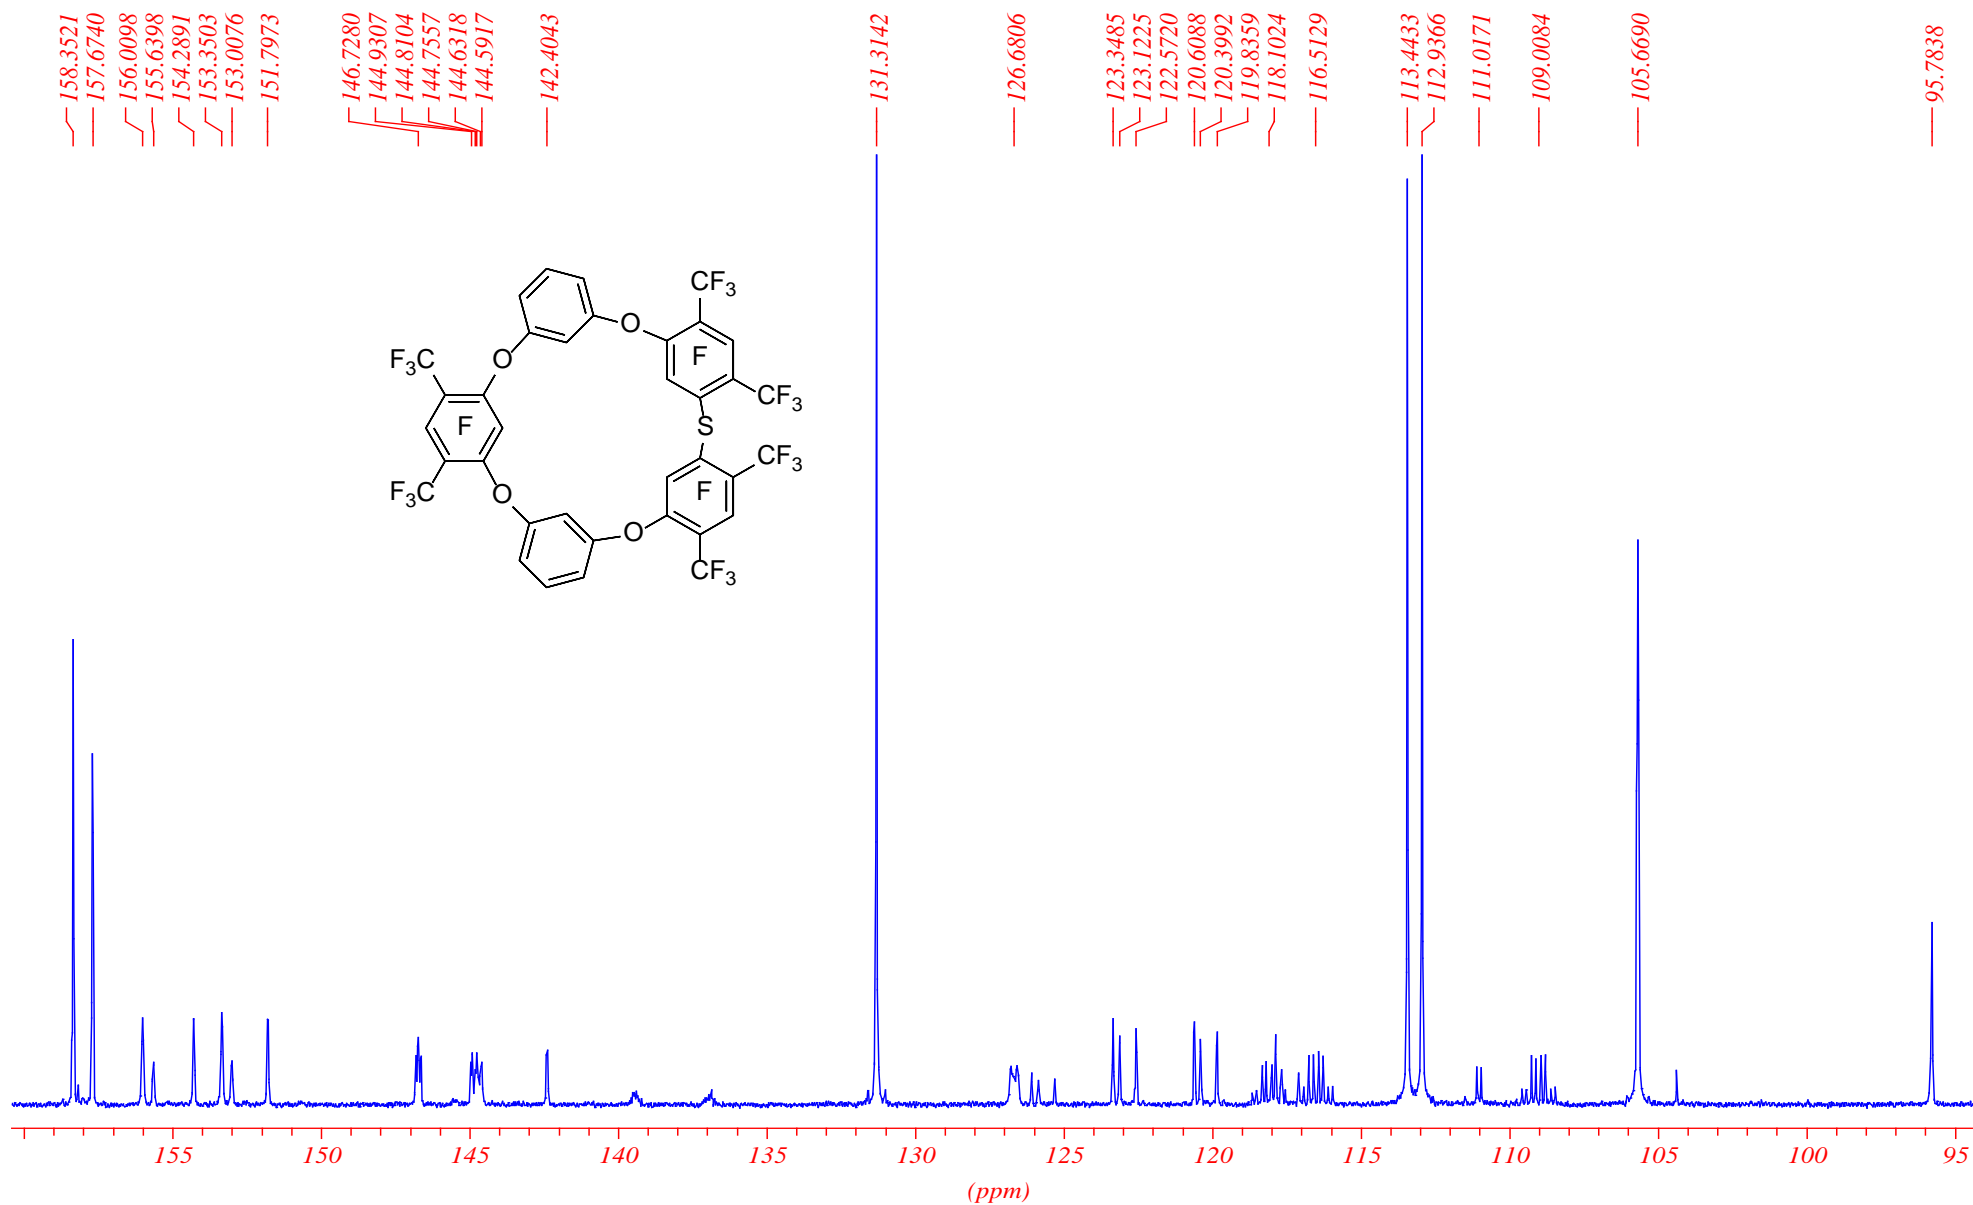

Figure S13. <sup>13</sup>C NMR spectra (acetone-d<sub>6</sub>) 11,23,29,31,32,34-hexafluoro-10,12,22,24,28,30-hexakis(trifluoromethyl)-2,8,14,20-tetraoxa-26-thiahexacyclo[25.3.1.1<sup>3,7</sup>.1<sup>9,13</sup>.1<sup>15,19</sup>.1<sup>21,25</sup>]pentatriaconta-1(31),3(35),4,6,9(34),10,12,15(33),16,18,21(32),22,24,27,29-pentadecaene **15**.
