# Supplementary material for: Synthesis of Polyfluorinated Thia- and Oxathiacalixarenes Based on Perfluoro-m-xylene
Source: MDPI journal article supplement (doi:10.3390/molecules26030526), 2021-01-20
Supplement: s1 [file s1]

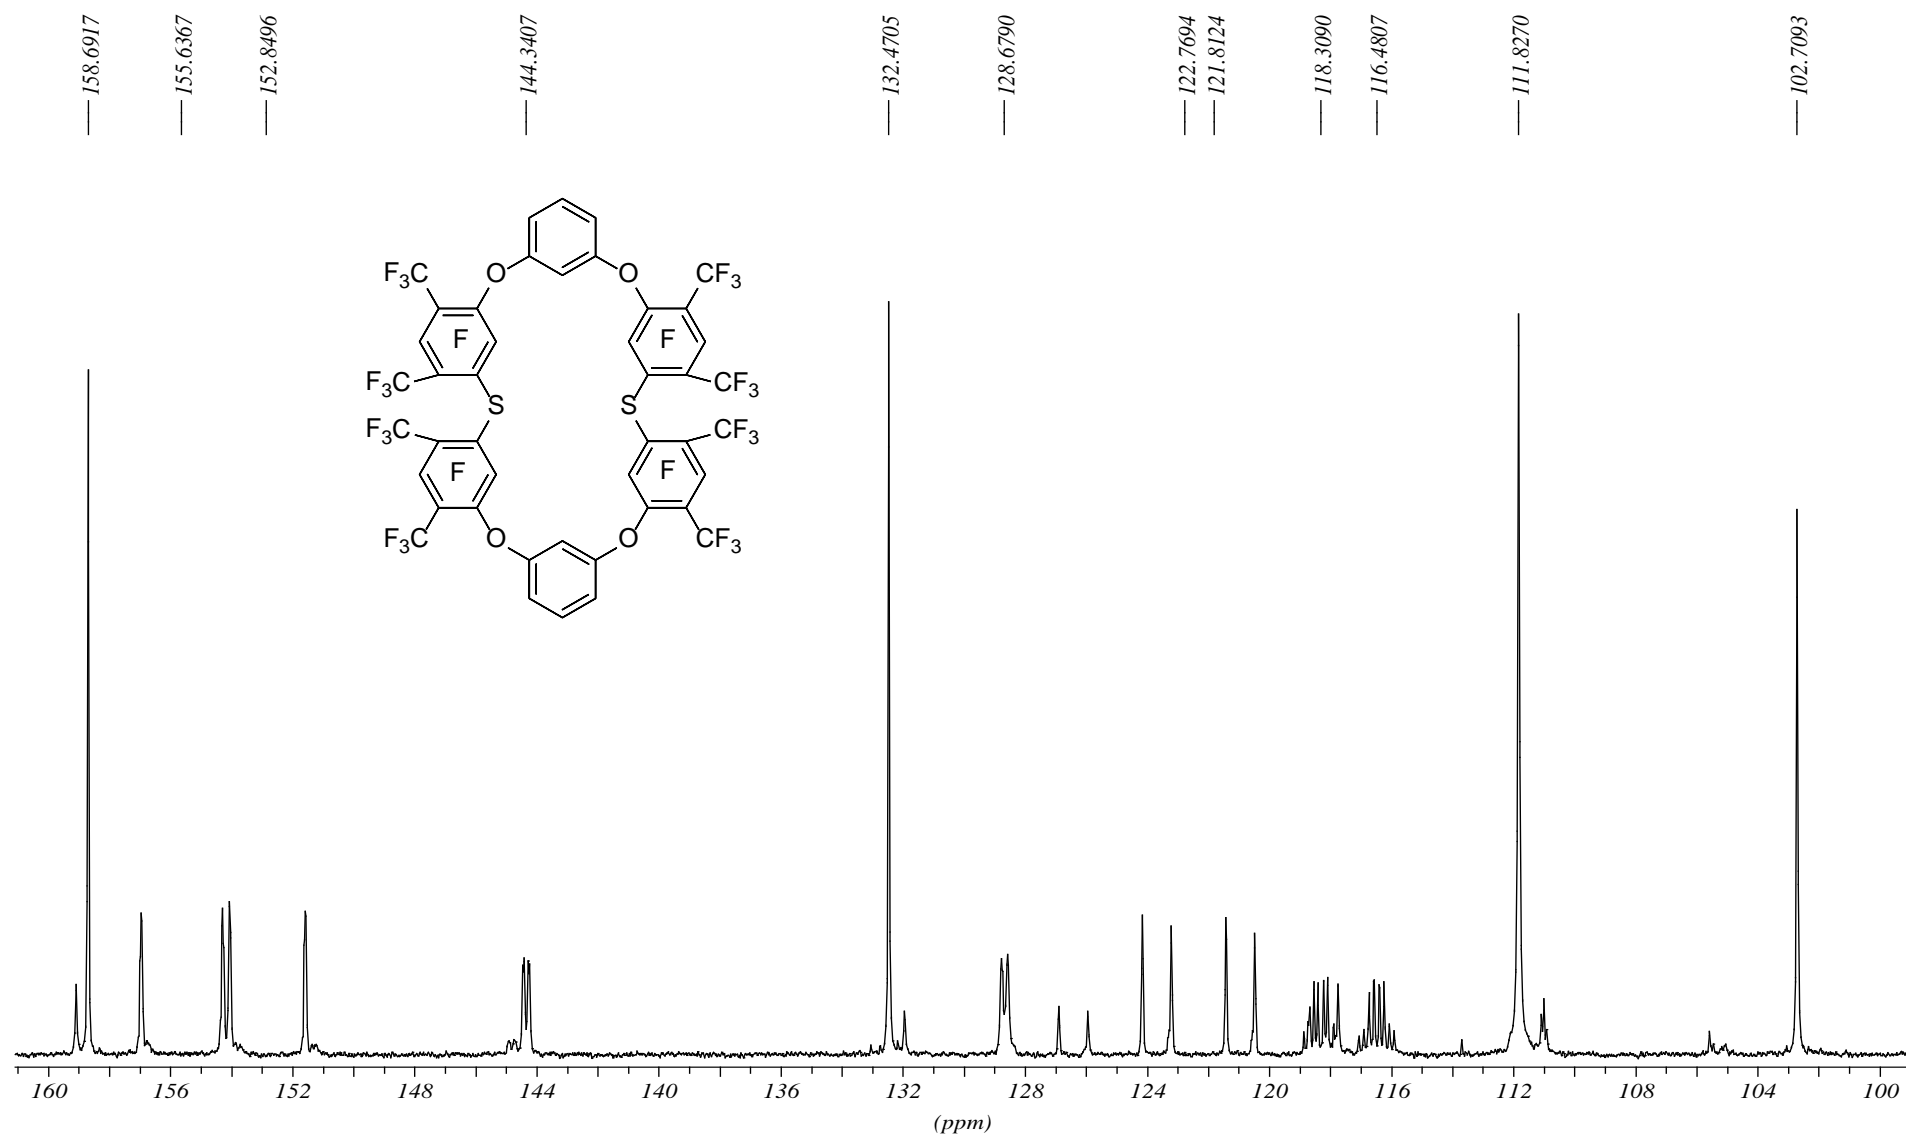

Figure S10.  $^{13}\text{C}$  NMR spectra (acetone- $d_6$ ) 11,17,29,35,37,38,40,41-octafluoro-10,12,16,18,28,30,34,36-octakis(trifluoromethyl)-2,8,20,26-tetraoxa-14,32-dithiaheptacyclo[31.3.1.1<sup>3,7</sup>.1<sup>9,13</sup>.1<sup>15,19</sup>.1<sup>21,25</sup>.1<sup>27,31</sup>]dotetraconta-1(37),3(42),4,6,9(41),10,12,15 (40),16,18,21(39),22,24,27(38),28,30,33,35-octadecaene **12**.
