# Supplementary material for: Synthesis of Polyfluorinated Thia- and Oxathiacalixarenes Based on Perfluoro-m-xylene
Source: MDPI journal article supplement (doi:10.3390/molecules26030526), 2021-01-20
Supplement: s1 [file s1]

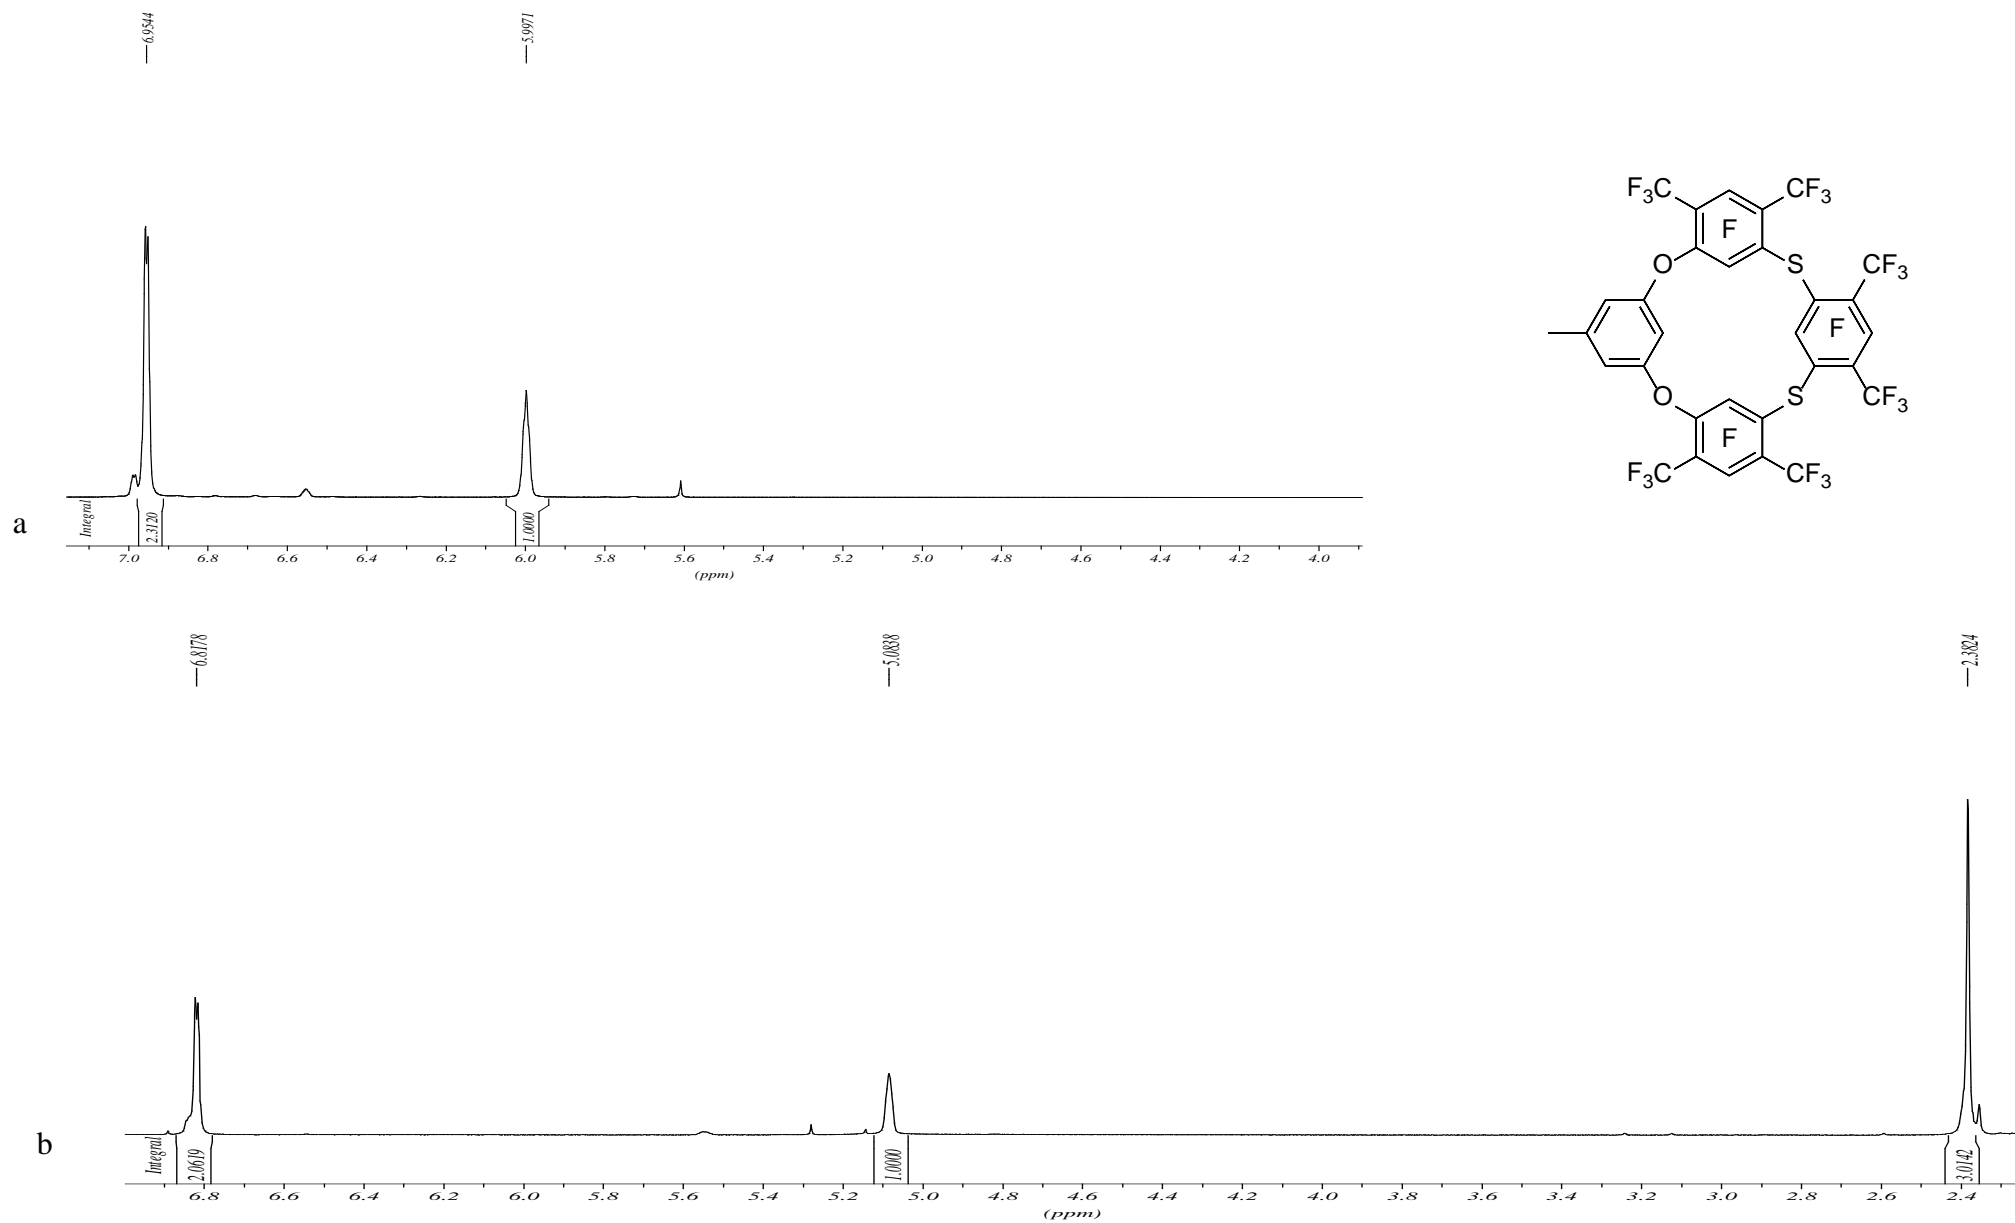

Figure S5.  $^1\text{H}$  NMR spectra of 11,17,23,25,26,27-hexafluoro-5-methyl-10,12,16,18,22,24-hexakis(trifluoromethyl)-2,8-dioxa-14,20-dithiapentacyclo[19.3.1.1<sup>3,7</sup>.1<sup>9,13</sup>.1<sup>15,19</sup>]octacos-1(25),3(28),4,6,9(27),10,12,15(26),16,18,21,23-dodecaene **9** in  $\text{acetone-}d_6$  (a) and  $\text{CDCl}_3$  (b)
