# Supplementary material for: Synthesis of Polyfluorinated Thia- and Oxathiacalixarenes Based on Perfluoro-m-xylene
Source: MDPI journal article supplement (doi:10.3390/molecules26030526), 2021-01-20
Supplement: s1 [file s1]

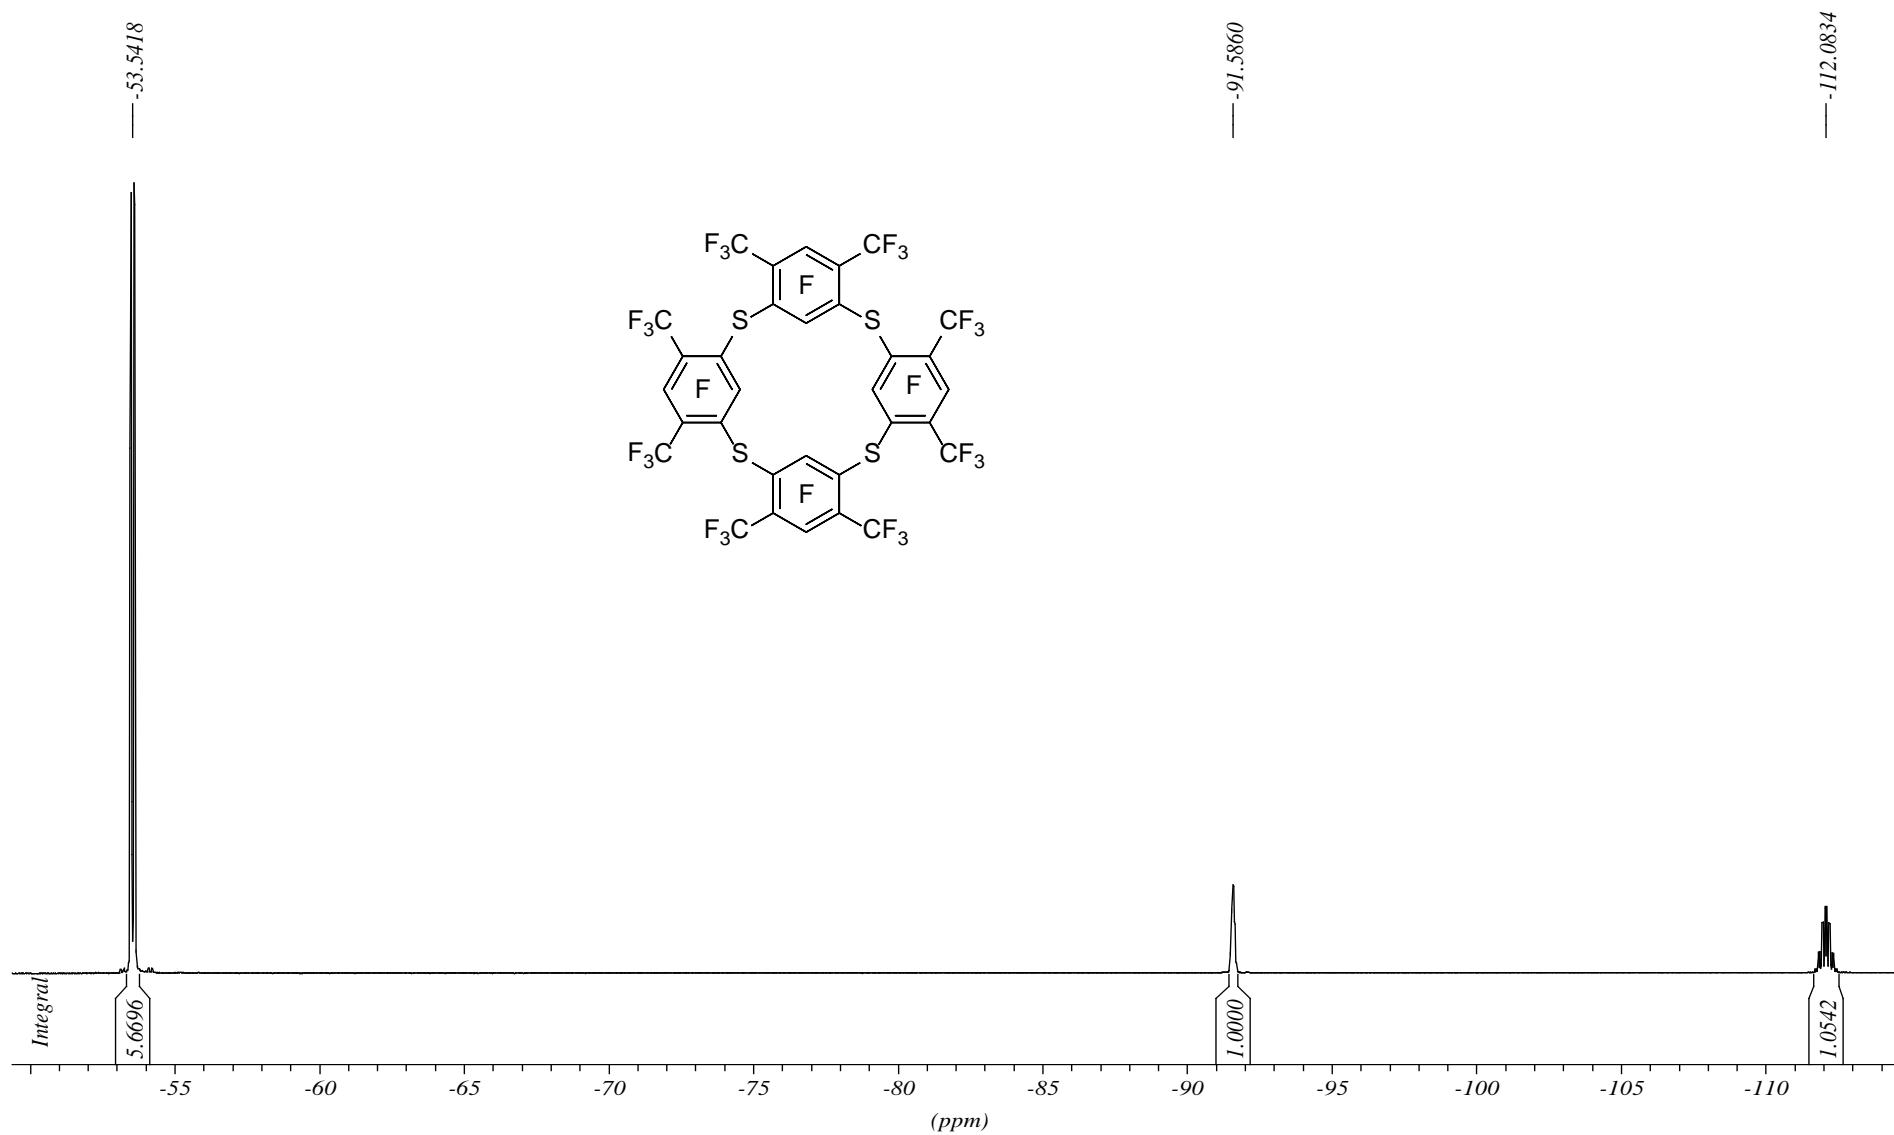

Figure S3.  $^{19}\text{F}$  NMR spectra (acetone- $d_6$ ) of 5,11,17,23,25,26,27,28-octafluoro-4,6,10,12,16,18,22,24-octakis(trifluoromethyl)-2,8,14,20-tetrathia-pentacyclo[19.3.1.1<sup>3,7</sup>.1<sup>9,13</sup>.1<sup>15,19</sup>]octacos-1(25),3(28),4,6,9(27),10,12,15(26),16,18,21,23-dodecaene **1**.
